# Supplementary material
Source: Research Square preprint supplement (doi:10.21203/rs.3.rs-9650438/v1)
Supplement: Supplementary file 1 [file 32e073862f2393f997faeb33.docx]

# Supplementary Materials. 1

Multiple transducer models are currently in use and commercially available; however, transducer configurations specifically optimized for targeting the deep cerebellar nuclei have not yet been systematically explored. To further empirically characterize the transducer capabilities required for targeting deep nuclei, we conducted an *in-silico* exploration, comparing the adequacy of commercially available transducers for deep cerebellar nuclei targeting. The objective of this analysis was to evaluate transducer configurations capable of accurately and precisely targeting the anterior-inferior-lateral region of the dentate nucleus (MNI coordinates: x = -16, y = -54, z = -37), while minimizing unintended exposure of surrounding structures. This target was selected as an example region within the dentate nucleus representing a non-motor network subregion. Nevertheless, we believe that the methodological approach and conclusions described here are generalizable to other dentate subregions as well as to other deep cerebellar nuclei.

To this end, we used a T1-weighted MNI152 template MRI, which provides a standardized representation of global brain anatomy and geometrical standards across large populations. The template was processed using the *Charm* pipeline in SimNIBS (v4.5) (Puonti et al., 2020; Saturnino, Puonti, et al., 2019) to generate segmented masks of the scalp, cortical bone, trabecular bone, and brain tissue. Acoustic and thermal material properties of the masks were then assigned according to Pichardo et al. (2023) (Pichardo, 2023). The dentate nuclei was manually segmented in native anatomical space. From the *Charm* output, we also obtained a finite element model (FEM) of our template brain, used for subsequent heuristic trajectory planning performed using PlanTUS to identify individual scalp locations whose surface normals intersected the target nucleus while minimizing transducer tilt. The resulting trajectory was then exported to the BabelBrain (v8.0) platform for detailed biophysical acoustic modeling and pressure field estimation, which uses viscoelastic wave propagation model to calculate the distribution of acoustic intensity and solves the bioheat transfer equation to estimate thermal effects (Pichardo, 2023).

Five commonly used commercially ultrasound transducers were evaluated, encompassing single-element, multi-element annular array, and multi-element phased array designs. Transducer selection was intended to span a broad range of fundamental frequencies, aperture sizes, and maximal focal depths. Specifically, the transducers evaluated included: (1) the CTX250 two-elements annular array transducer (SonicConcepts, USA) operating at 250 Khz, with 64 mm diameter aperture and up to 60 mm maximal focal depth; (2) the CTX500 four-elements annular array transducer (SonicConcepts, USA) operating at 500 Khz, with 64 mm diameter aperture and up to 63.2mm maximal focal depth; (3) the Pulse single-element transducer (BrainSonix, USA) operating at 650 Khz, with 61 mm diameter aperture and up to 80 mm maximal focal depth; (4) the H317 128-element phased array transducer (SonicConcepts, USA) operating at 250 Khz, with 135 mm diameter aperture and up to 133 mm maximal focal depth; and (5) the DPX500 four-elements annular array transducer (SonicConcepts, USA) operating at 500 Khz, with 64 mm diameter aperture and up to 150 mm maximal focal depth.

For each transducer, separate pressure free-water and intracranial simulations were performed. All simulations employed the following sonication regime: a pulse duration of 10 ms (no-ramping), repeated every 100 ms (pulse repetition frequency of 10 Hz), corresponding to a 10% duty cycle; a total sonication duration of 5 s; and an in-situ derated spatial-peak pulse-average intensity (Isppa) of 10 W/cm². Focal depth was adjusted by estimating the distance between the selected scalp entry point and the target location, defined as the center of gravity of the dentate nucleus leading to 57.5 mm depth distance. The only exception was the single-element Pulse (Bsonix) transducer, which had a fixed focal depth of 80 mm. To account for the presence of coupling media, the transducer was positioned 0.5 cm away from the scalp along the Z-axis, thereby incrementing focal depth 0.5 cm from the scalp-target distance (58 mm depth). Pressure field simulations were first conducted, and normalized pressure maps were examined to assess ultrasound propagation. When required, mechanical steering adjustments were performed to minimize the distance between the in situ, skull-derated spatial peak-pressure focal region and the target’s center of gravity. These adjustments optimized transducer spatial alignment in the X and Y spatial planes or focal depth while remaining within the transducer’s maximum operational range.

The pressure simulations were analyzed to characterize transducer performance using the following metrics: (1) the percentage overlap (fraction) between the focal -1dB region and the target volume; (2) the Euclidean distance between the spatial peak center of gravity and the intended target (MNI coordinates); (3) the volume of the -3 dB focal area; and (4) the maximum focal depth of each transducer configuration. These metrics were extracted to evaluate off-target exposure, focality and effective operating range, informing about the overall feasibility of each transducer for realistic experimental human applications (Figure 2).

To enable direct comparison across heterogeneous units and scales, all metrics were normalized using min-max normalization. For each transducer *i* and performance metric *j*, raw metric values were transformed into normalized scores ∈ [0,1] using min-max normalization across all tested transducers. Metrics to be maximized (-1dB percentage overlap, maximum focal depth) were normalized as

whereas the metrics to be minimized (Euclidean distance between the spatial peak, and the -3dB focal volume) were inverted according to

ensuring that, for all axes, larger normalized values correspond to superior performance. Finally, the idealized performance pattern *Y* was computed as the arithmetic mean of the normalized metric vectors of the *Pareto-optimal* (i.e., optimized pattern) transducers *P* (i.e.,identified when no other transducer was outperformed simultaneously across all normalized performance metrics), such that

.

# Supplementary Materials. 2

tFUS EEG can produce electrical coupling-like artifacts difficult to identify in raw human recordings. Phantom-based characterization of stimulation-induced non-physiological artifacts can provide critical insights into their reproducibility and underlying properties. For instance, comparing the temporal and spatial dynamics of artifacts observed in phantom models with those recorded in the human brain can offer an initial assessment of their recurrence and distinguish tFUS evoked non-physiological artifacts from neurophysiological signals.

To further disentangle neuronal responses from artifacts, we experimentally characterized signal artefacts in (1) a biological tissue-mimicking conductive phantom (*Citrullus lanatus*, watermelon), and (2) during a human tFUS-EEG experiment, with the participant seated, at rest and maintaining eyes open. This approach, inspired by established practices in the TMS-EEG field (Veniero et al., 2009), allowed us to isolate and characterize non-neuronal artifactual signal components under controlled conditions. Indeed, watermelons offer a comparable experimental model given that the surface dielectric constant of watermelons (ε′=30-50, 200 MHz–2 GHz) is comparable to human skin (ε′=40-50; 200-500 MHz). Furthermore, the pulp’s relative ε′ (ε′=70-80) exceeds that of the surface (O. Nelson et al., 2008), mirroring the dielectric contrast between gray matter and the human skin. EEG was recorded in both cases (watermelon phantom and human) with BrainVision Recorder software (Brain Products GmbH, Germany) from 59 passive Ag/AgCl electrodes placed in an equidistant EEG cap (M10 cap layout, BrainCap, Brain Products GmbH, Germany). All electrodes were prepared using electroconductive abrasive gel (Abralyt HiCl) keeping impedances constant below <10 kΩ. The reference and ground electrodes were placed in the EEG net between Cz-FCz, and between AFz-AF4, respectively. The occipital-left electrodes from the cap (n=5) were removed to accommodate the ultrasound transducer, simulating a transducer position for “cerebellar-like” stimulation. EEG was recorded with a TMS-EEG compatible amplifier (actiCHamp Plus 64 System, Brain Products GmbH, Germany) at a sampling frequency of 5kHz. Concurrent ultrasound stimulation was applied with a NeuroFUS TPO and a CTX-500 transducer (four-element ultrasound transducer, 64 mm diameter, with a fundamental frequency of 500kHz, SonicConcepts, Washington, USA). We coupled the transducer with centrifugated ultrasound transmission gel (Aquasonic100, Parker Laboratories Inc.) applied to the transducer surface and the phantom, and a hydrogel pad placed in between (Aquaflex, Parker Laboratories Inc, 80mm Diameter, 20mm Width). As far as practically possible, we ensured no air bubbles in any of the surfaces.

The phantom assessment included two distinct experimental conditions with 40 trials each: (1) 10Hz pulse repetition frequency (Prf.) pulse trains (pulse duration 10ms, inter-pulse interval of 100ms, total burst duration of 1 second with 10 pulses per burst, inter-bursts duration of 7 seconds) (**Supplementary** Figure 1,.A.3 top left, and B.1); and (2) 20Hz Prf. pulse trains (pulse duration 10ms, inter-pulse interval of 50ms, total burst duration of 1second with 20 pulses per burst, inter-bursts duration of 7 seconds) (**Supplementary** Figure 1, A.3 top right, and B.2). The free-field spatial peak pulse average intensity (free-water *I*SPPA) was fixed at 30W/cm², and the focal depth at 60mm from the transducer exit plane. On the other hand, the human experiment involved one experimental condition (40 trials) with 10Hz Prf. pulse trains (pulse duration 5ms, inter-pulse interval of 100ms, total burst duration of 1 second with 10 pulses per burst, inter-bursts duration of 7 seconds) (**Supplementary** Figure 1, A.3 bottom left, and B.3). With such 10HzPrf. parameters, we tested 6 different power output levels, setting the free-field spatial peak pulse average intensity (free-water *I*SPPA) at 5, 10, 15, 20, 25 and 30W/cm² and the focal depth fixed at 60mm from the transducer exit plane. Concurrent phantom and human tFUS-EEG recordings revealed fast, capacitive-coupling-like polarization EEG artifacts time-locked to the pulse repetition frequency (**Supplementary** Figure 1, B.). Depending on the EEG system and its internal hardware or software configuration, particularly the application of pre-digitalization bandpass filters, these artifacts may manifest as sharp voltage transients during active ultrasound pulses, appearing as abrupt gain changes and slow signal drifts resembling Direct Current (DC-coupling) artifacts. In our experiments, using the actiCHamp amplifier with a 0.016 Hz high-pass DC-correction, slow DC drifts were effectively attenuated; however, spike artifacts remained prominent at the onset and offset of each ultrasound pulse. Specifically, we observed consistent, trial-to-trial spike-shaped transients corresponding to the pulse duration (one spike at the up-phase and one at the down-phase of each pulse), with near-constat amplitude across the different tested power levels.

**
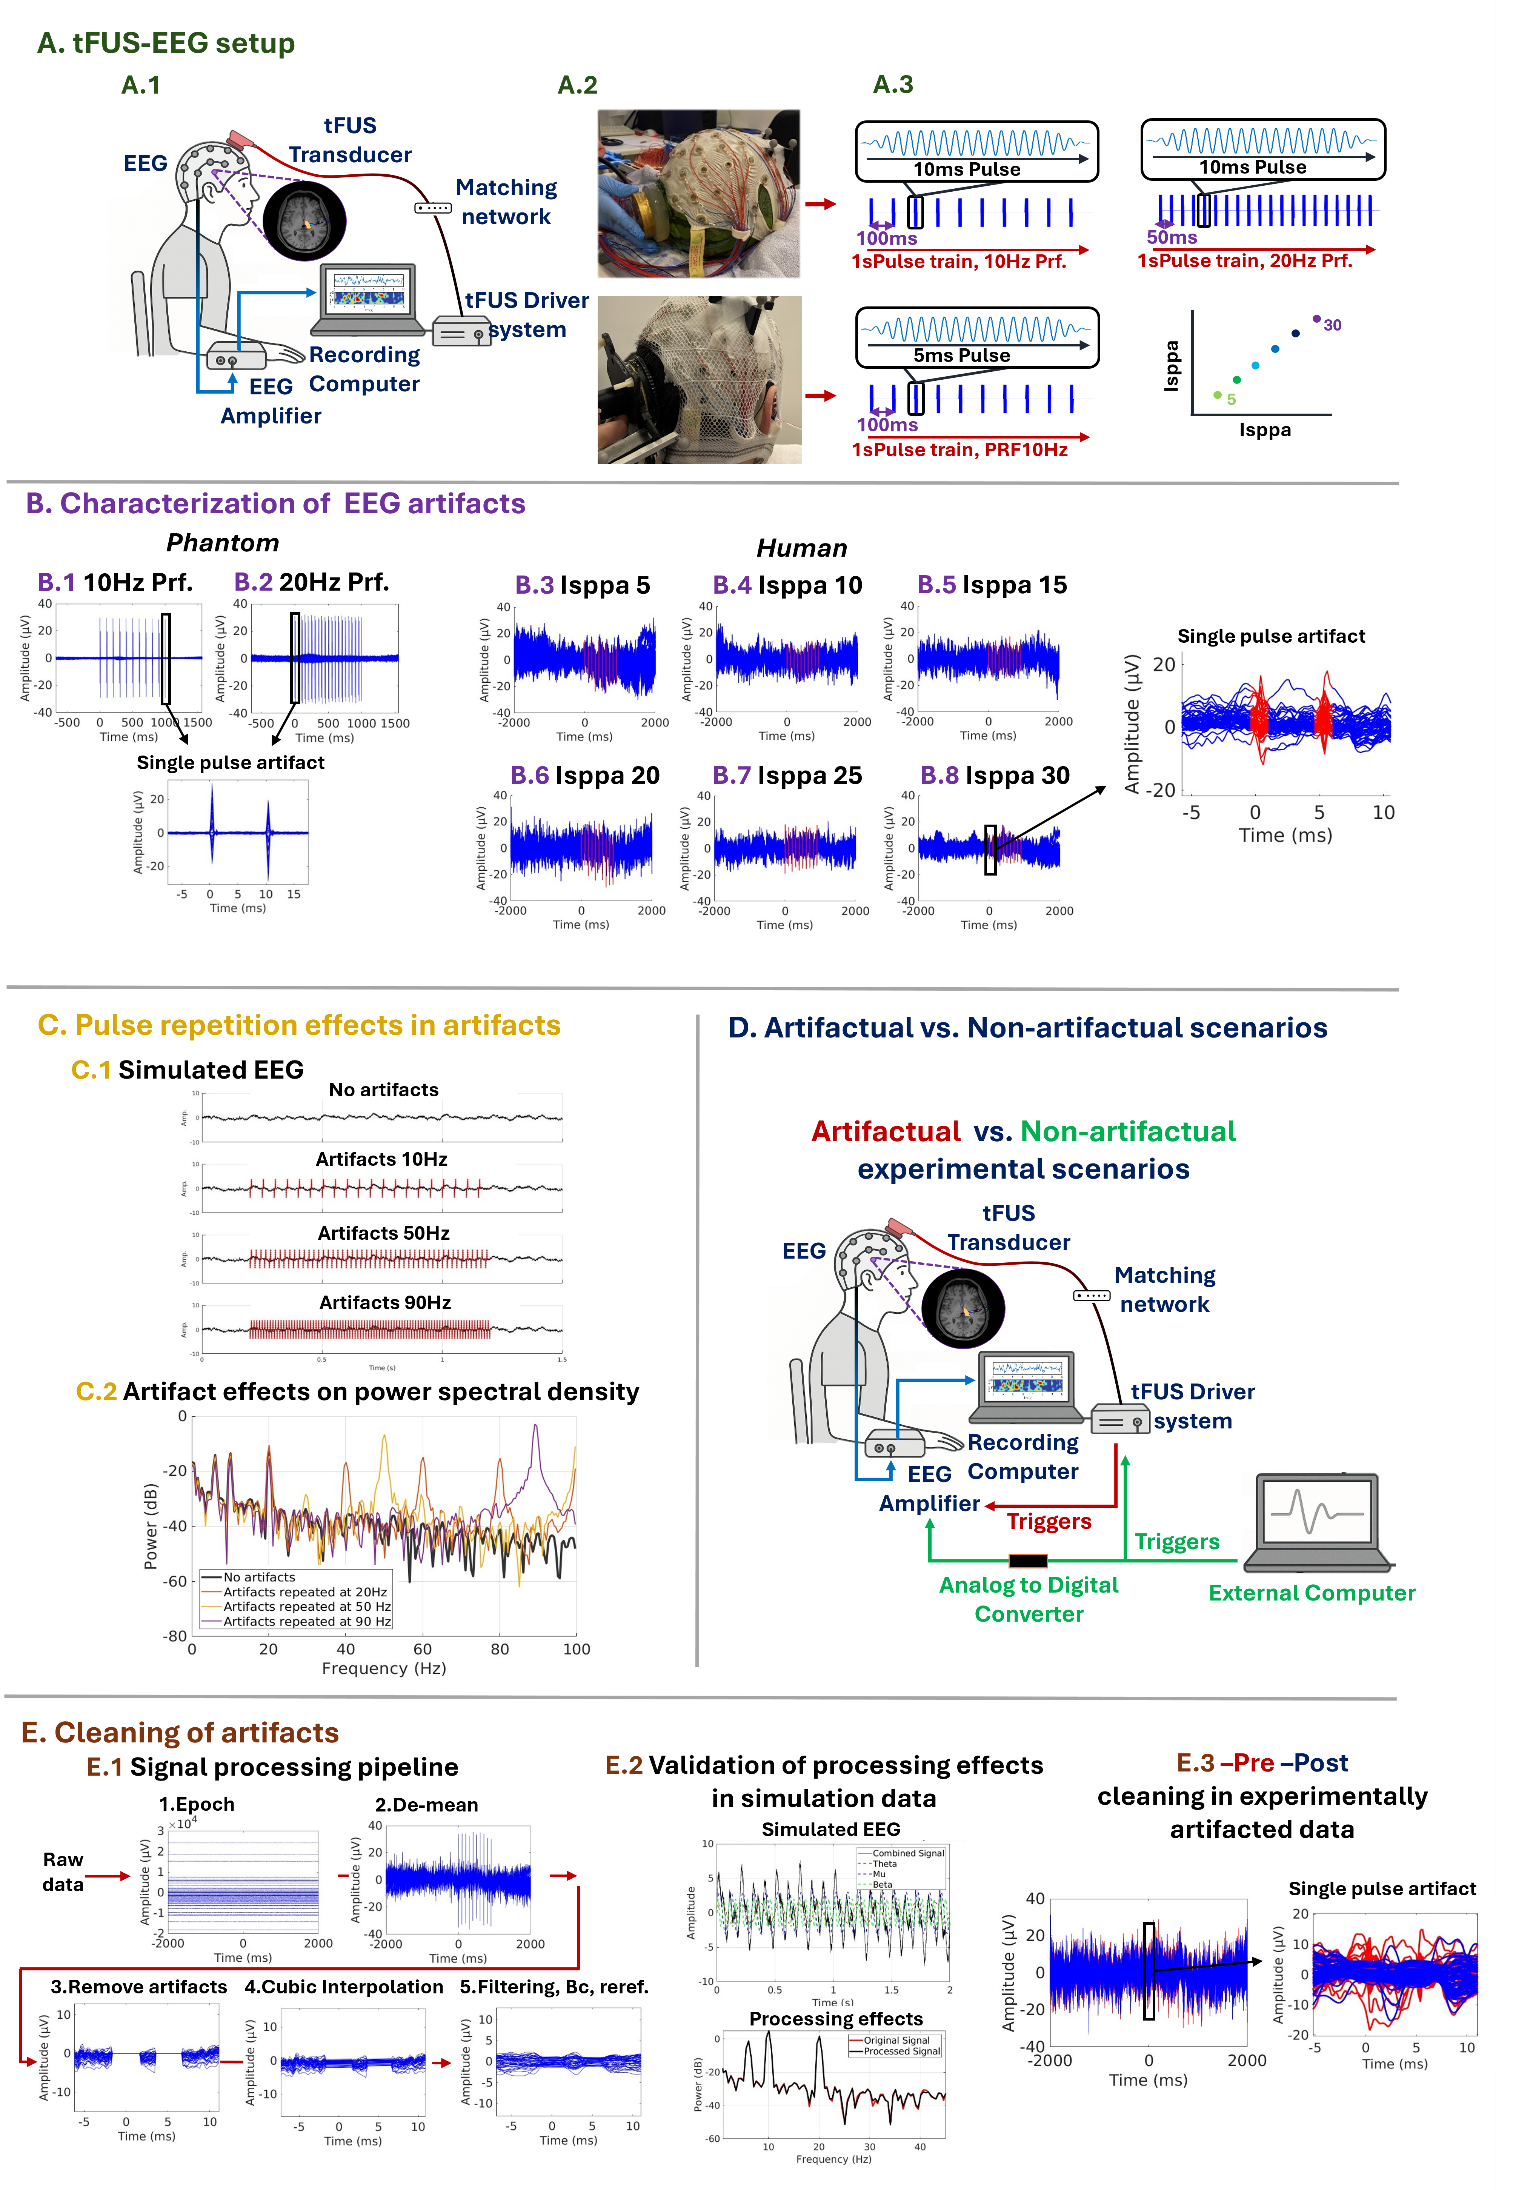
**

**Supplementary Figure 1. Concurrent tFUS-EEG setup and artifact characterization A. tFUS-EEG setup. A.1** Schematic simplified diagram of the setup for concurrent tFUS-EEG. EEG signals are recorded in real time using a dedicated computer. tFUS can be triggered independently or informed by EEG in a brain-state-dependent manner. Both immediate and delayed evoked potentials, as well as oscillatory neural dynamics, can be captured to verify functional target engagement, map causally brain circuits, and inform neuromodulation protocols. **A.2.** Phantom (top) and real-world human (bottom) concurrent tFUS-EEG setup employed allowing the placement of a custom transducer-holding system with a CTX500 transducer (SonicConcepts USA), and the application of coupling media. **A.3.** Experimentally tested pulse regime parameters.The top-left panel illustrates the pulsing schemes used for the *phantom 10 Hz* condition, while the top-right panel shows the schemes for the *phantom 20 Hz* condition. Both pulse regimes were delivered at a fixed free-water intensity of 30 W/cm² Isppa. The bottom-left panel depicts the pulsing scheme employed in the *human 10 Hz* condition, which was evaluated across six different Isppa intensity levels: 5, 10, 15, 20, 25 and 30W/cm² (bottom-right panel). **B. Characterization of artifacts.** Raw artifacted EEG (epoched and de-mean corrected) grand average time-series (i.e., Event Related Potentials) from the phantom 10Hz Prf. condition (**B.1**); the phantom 20H Prf. condition (**B.2**); and the human 10Hz Prf. condition (**B.3-8** across the different Intensity levels) including all available sensors with the pulsing artifacts highlighted in **red**. Note that all conditions generated “within-pulse” artifacts, with sharp short lasting (1-1.5ms) artifacts at the up-phase (onset) and at the down-phase (offset) of each TUS pulse. Those artifacts were repeated at different frequency according to the PRF of each condition, with a 100ms latency for the 10Hz conditions and 50ms latency for the 20Hz. **C. Duty cycle (pulse repetition frequency) effects on artifacts.** Figure **C.1** illustrates the presence of stimulation-induced artifacts across several pulse repetition frequencies (PRFs; 10, 50, and 90 Hz) on a synthetic in-silico simulated EEG signal composed of *theta*, *mu*, and *beta* components, along with *1/f noise*. Following, artifacts were introduced, signals were band-pass filtered (0.2-100Hz), and their power spectral density (PSD) was subsequently estimated. As shown in Figure **C.2**, the PSD of the artifact-contaminated and filtered signals demonstrates that stimulation artifacts systematically increase spectral power at the corresponding Prf. Although spectral power estimates may already show minor distortions at low PRFs, the magnitude of the artifact-related bias increases substantially as the Prf. becomes higher. **D.** **Artifactual and Non-Artifactual experimental scenarios.** Illustration of experimental configurations likely to induce artifactual direct current coupling-like artifacts (when badly electrically insulated, red arrow) and non-artifactual clean EEG readouts (green arrow). Configurations in which output triggers are sent directly from the transducer driver system to the EEG amplifier for digital timestamping are highly susceptible of artifactual EEG when equipment is inadequately electrically insulated. Alternatively, a configuration where triggers are sent from an external experimental computer controlling the TPO system, and in parallel, converting the analog trigger signal to a digital timestamp in the EEG recordings likely eliminates the presence of artifactual signals. **E.** **Cleaning of artifacts.** To provide a potential solution for EEG artifacts, we further developed a signal processing pipeline intended to clean the raw tFUS-EEG signals**. E.1** Signal preprocessing proposed pipeline to remove artifacts and explore a realistic EEG cleaning scenario from brain recordings. The pipeline includes minimal processing steps: (1) epoching the data (-2s to 2s) centered at the onset of the first pulse of the pulse train, (2) de-meaning, (3) segmentation of segments containing sharp artifacts (from -1.5ms to +1.5ms around each artifact) and cubic interpolation, and (4) band-pass filtering between 0.2 to 500 Hz with a 2nd order zero-phase Butterworth filter; baseline correction (-210, -10ms) and re-referencing to the average may be also considered if experimentally necessary. **E.2.** Validation of the processing pipeline. To assess whether the processing pipeline introduced by itself spurious effects on spectral power, a simulated EEG signal composed of *theta*, *mu*, and *beta* components, along with *1/f noise*, was processed through the same pipeline. The top panel shows the simulated EEG signal, while the bottom panel displays the Welch spectral power density of the signal before and after processing, demonstrating no alteration in spectral power attributable to the pipeline. **E.3.** Effects of the cleaning pipeline on artifact-contaminated human tFUS-EEG data. The grand average time-series (ERP) comparison between pre- and post- signal processing for the human experimental 30W/cm² condition (-***Pre*** (**red** trace time-series) -***Post*** (**blue** trace time-series)), suggesting that a minimal processing pipeline is necessary and sufficient to effectively remove the DC coupling-like artifacts. Depending on the experimental scenarios, additional processing steps to remove ocular, muscular, motion or other artifacts may be required. All signal processing and analyses were conducted using custom MATLAB (The MathWorks Inc., Natick, USA) scripts, employing functions from *EEGlab* (UC San Diego, USA) and *FieldTrip* ([Radboud University](https://www.ru.nl/), Netherlands) toolbox. Example scripts for TUS-EEG processing are available at the permanent link: <https://github.com/XavierCorominas/SAFE-FUS>.

# Supplementary table 1

| **Study** | **Etiology** | **Indication** | **Target** | **Clinical evaluation** | **Outcomes** | **Numb. Of participants** |
| --- | --- | --- | --- | --- | --- | --- |
| **(Sokal et al., 2015) [1]** | Cerebral palsy | Dystonia | Bilateral DN | Ashworth, VAS, UDRS | Decrease of spasticity and dystonia | 13 |
| **(Teixeira et al., 2015) [2]** | Stroke | Dystonia, Ataxia | Bilateral DN | F-T-M-RS, SARA, UDRS | Decrease of tremor, ataxia | 1 |
| **(Cury, França, Barbosa, et al., 2019) [3]** | Stroke | Tremor, Ataxia | Unilateral DN  (contralateral to stroke hemisphere) | F-T-M-RS, SARA | Decrease of tremor, ataxia | 1 |
| **(Cury, França, Silva, et al., 2019) [4]** | Spinocerebellar ataxia | Ataxia | Bilateral DN | F-T-M-RS, SARA | Decrease of ataxia and tremor | 1 |
| **(Brown et al., 2020) [5]** | Infant stroke | Dystonia | Bilateral DN | BFMDRS | Decrease of dystonia | 1 |
| **(Horisawa et al., 2020) [6]** | Unknown | Dystonia | Bilateral SCPs and bilateral DN | BADS, Ashworth, VAS | Decrease of spasticity, dystonia and pain | 1 |
| **(Lin et al., 2020) [7]** | Cerebral palsy | Dystonia | Bilateral DN | BFMDRS, Ashworth | Decrease of spasticity, dystonia and pain | 1 |
| **(Horisawa et al., 2021) [8]** | Unknown | Tremor, Dystonia | Bilateral DN | F-T-M-RS, BFMDRS-MS | Decrease of tremor, dystonia | 1 |
| **(Paraguay et al., 2021) [9]** | Essential tremor | Tremor | Bilateral DN | F-T-M-RS | Decrease of tremor | 1 |
| **(Cury et al., 2022) [10]** | Spinocerebellar ataxia (n=2), Stroke (n=2), cerebral palsy (n=1) | Ataxia | Bilateral DN | F-T-M-RS, SARA | Decrease of ataxia | 5 |
| **(Cui et al., 2023) [11]** | Spinocerebellar ataxia | Dystonia, Ataxia | Bilateral DN and GPi | F-T-M-RS, SARA, BFMDRS | GPi alone - decrease of dystonia and small improvement in ataxia.  DN alone - decrease of ataxia axial | 1 |
| **(Cajigas et al., 2023) [12]** | Cerebral palsy | Dystonia | Bilateral DN | BFMDRS | Decrease of dystonia | 3 |
| **(Baker et al., 2023) [13]** | Stroke | Hemiplegia | Unilateral DN  (contralateral to stroke hemisphere) | FMA-UE, AMAT | Increase of upper extremity functional mobility and corticospinal excitability | 12 |
| **(Zhao et al., 2025) [14]** | Spinocerebellar ataxia | Ataxia | Bilateral DN | SARA, ICARS | Decrease of ataxia | 6 |
| **Supplementary Table 1.** **Summary of human studies investigating the effects of deep brain stimulation (DBS) in the deep cerebellar nuclei.** Studies are organized chronologically by year of publication, from earliest (top) to most recent (bottom). Note that several complementary studies followed the investigation by *Baker, K. B., et al. (2023)*; however, they are not included in this table as they examined the same cohort of implanted patients. VAS: Visual Analog pain Scale; Ashworth: Ashworth Spasticity Scale; URDS: Unified Dystonia Rating Scale; BADS: Barry-Albright Dystonia Rating Scale; F-T-M-RS: Fahn, Tolosa, Marin Tremor Rating Scale; SARA: Scale for the Assessment and Rating of Ataxia; ICARS: International Cooperative Ataxia Rating Scale; FMA-UE: Fugl-Meyer Upper-Extremity; AMAT: Arm Motor Ability Test; SCPs: superior cerebellar peduncles; DN: Dentate Nuclei. | | | | | | | |

***Supplementary Table 1 references***

[1] Sokal P, Rudaś M, Harat M, Szylberg Ł, Zieliński P. Deep anterior cerebellar stimulation reduces symptoms of secondary dystonia in patients with cerebral palsy treated due to spasticity. Clin Neurol Neurosurg 2015;135:62–8. https://doi.org/https://doi.org/10.1016/j.clineuro.2015.05.017.

[2] Teixeira MJ, Cury RG, Galhardoni R, Barboza VR, Brunoni AR, Alho E, et al. Deep brain stimulation of the dentate nucleus improves cerebellar ataxia after cerebellar stroke. Neurology 2015;85:2075–6. https://doi.org/10.1212/WNL.0000000000002204.

[3] Cury RG, França C, Barbosa ER, Galhardoni R, Lepski G, Teixeira MJ, et al. Dentate nucleus stimulation in a patient with cerebellar ataxia and tremor after cerebellar stroke: A long-term follow-up. Parkinsonism Relat Disord 2019;60:173–5. https://doi.org/https://doi.org/10.1016/j.parkreldis.2018.10.001.

[4] Cury RG, França C, Silva V, Barbosa ER, Capato TTC, Lepski G, et al. Effects of dentate nucleus stimulation in spinocerebellar ataxia type 3. Parkinsonism Relat Disord 2019;69:91–3. https://doi.org/https://doi.org/10.1016/j.parkreldis.2019.10.029.

[5] Brown EG, Bledsoe IO, Luthra NS, Miocinovic S, Starr PA, Ostrem JL. Cerebellar Deep Brain Stimulation for Acquired Hemidystonia. Mov Disord Clin Pract 2020;7:188–93. https://doi.org/https://doi.org/10.1002/mdc3.12876.

[6] Horisawa S, Arai T, Suzuki N, Kawamata T, Taira T. The striking effects of deep cerebellar stimulation on generalized fixed dystonia: case report. Journal of Neurosurgery JNS 2020;132:712–6. https://doi.org/https://doi.org/10.3171/2018.11.JNS182180.

[7] Lin S, Zhang C, Li H, Wang Y, Wu Y, Wang T, et al. High Frequency Deep Brain Stimulation of Superior Cerebellar Peduncles in a Patient with Cerebral Palsy. Tremor and Other Hyperkinetic Movements 2020. https://doi.org/10.5334/tohm.551.

[8] Horisawa S, Kohara K, Nonaka T, Mochizuki T, Kawamata T, Taira T. Case Report: Deep Cerebellar Stimulation for Tremor and Dystonia. Front Neurol 2021;Volume 12-2021.

[9] Paraguay IB, França C, Duarte KP, Diniz JM, Galhardoni R, Silva V, et al. Dentate nucleus stimulation for essential tremor. Parkinsonism Relat Disord 2021;82:121–2. https://doi.org/https://doi.org/10.1016/j.parkreldis.2020.12.001.

[10] Cury RG, França C, Duarte KP, Paraguay I, Diniz JM, Cunha P, et al. Safety and Outcomes of Dentate Nucleus Deep Brain Stimulation for Cerebellar Ataxia. The Cerebellum 2022;21:861–5. https://doi.org/10.1007/s12311-021-01326-8.

[11] Cui Z, Lan Y, Chang Y, Liu X, Wang J, Lou X, et al. Case report: Short-term efficacy and changes in 18F-FDG-PET with acute multi-target stimulation in spinocerebellar ataxia type 3 (SCA3/MJD). Front Neurol 2023;Volume 14-2023.

[12] Cajigas I, Morrison MA, Luciano MS, Starr PA. Cerebellar deep brain stimulation for the treatment of movement disorders in cerebral palsy. J Neurosurg 2023;139:605–14. https://doi.org/https://doi.org/10.3171/2023.1.JNS222289.

[13] Baker KB, Plow EB, Nagel S, Rosenfeldt AB, Gopalakrishnan R, Clark C, et al. Cerebellar deep brain stimulation for chronic post-stroke motor rehabilitation: a phase I trial. Nat Med 2023;29:2366–74. https://doi.org/10.1038/s41591-023-02507-0.

[14] Zhao L, Qiu C, Dong W, Luo B, Sun J, Yan J, et al. Dentate Nucleus Deep Brain Stimulation for Spinocerebellar Ataxia: Results of a 6-Month Follow-Up. Movement Disorders 2025;n/a. https://doi.org/https://doi.org/10.1002/mds.70116.

# Supplementary table 2

| **Study** | **tFUS target** |  | **tFUS Parameters** | **EEG readout** | **EEG Study Outcomes** | **Numb. Of participants** |
| --- | --- | --- | --- | --- | --- | --- |
| **(Legon et al., 2014) [1]** | S1 |  | FF (kHz): 500  PD (ms): 0.36  PRF (Hz): 1000  DC (%): 36  SD (s): 0.5  Isppa water (*W/*: 23.9 | Online ERP and ERSP | Reduction of ERP and ERSP amplitudes (SEP evoked) | 10 |
| **(Mueller et al., 2014) [2]** | S1 |  | FF (kHz): 500  PD (ms): 0.36  PRF (Hz): 1000  DC (%): 36  SD (s): 0.5  Isppa_water (*W/*: 23.9 | Online ERSP and Phase rate | Reduction ERSP amplitudes, and phase dependent effects (SEP evoked) | 18 |
| **(Lee et al., 2015) [3]** | S1 |  | FF (kHz): 250  PD (ms): 1  PRF (Hz): 500  DC (%): 50  SD (s): 0.3  Isppa_water (*W/*: 3 | Online ERP | Reduction of ERP amplitudes (SEP evoked) | 18 |
| **(Lee et al., 2016) [4]** | V1 |  | FF (kHz): 250  PD (ms): 1  PRF (Hz): 500  DC (%): 50  SD (s): 0.3  Isppa_water (*W/*: 16.6 | Online ERP | Reduction of ERP amplitudes (VEP evoked) | 19 |
| **(Legon et al., 2018) [5]** | VPL |  | FF (kHz): 500  PD (ms): 0.36  PRF (Hz): 1000  DC (%): 36  SD (s): 0.5  Isppa_water (*W/*: 14.5 | Online ERP and ERSP | Reduction of ERP and ERSP amplitudes (SEP evoked) | 20 |
| **(Butler et al., 2022) [6]** | V5 |  | FF (kHz): 500  PD (ms): 0.5  PRF (Hz): 1000  DC (%): 50  SD (s): 0.3  Isppa_water (*W/*: 5.7 | Online ERP | Reduction of ERP (VEP evoked) | 16 |
| **(Braun et al., 2020) [7]** | V1 |  | FF (kHz): 500  PD (ms): 0.5  PRF (Hz): 1000  DC (%): 50  SD (s): 0.3  Isppa_water (*W/*: 5.4 | Online ERP | Reduction of auditory ERP when auditory masked (Auditory evoked) | 18 |
| **(Yu et al., 2021) [8]** | S1 |  | FF (kHz): 500  PD (ms): 0.2  PRF (Hz): 300 & 3000  DC (%): 6  SD (s): 0.5  Isppa_water (*W/*: 5.6 | Online ERP | Increase of ERP (Voluntary movement evoked) | 15 |
| **(Liu et al., 2021) [9]** | S1 |  | FF (kHz): 500  PD (ms): 0.2  PRF (Hz): 300  DC (%): 6  SD (s): 0.5  Isppa_water (*W/*: 5.6 | Online ERP | Increase of ERP (Peripheric vibration evoked) | 9 |
| **(Y. G. Kim et al., 2022) [10]** | mPFC |  | Excitatory- FF (kHz): 250 / PD (ms): 0.5 / PRF (Hz): 300 / DC (%): 70 / SD (s): 0.3 / PTRI (s): 5 / PTRD (min): 20 / Isppa_water (*W/*: 3  Inhibitory: FF (kHz): 250 / PD (ms): 0.5 / PRF (Hz): 300 / DC (%): 5 / SD (s): 0.3 / PTRI (s): 5s / PTRI (s): 0 / PTRD (min): 20 / Isppa_water (*W/*: 3 | Offline PSD at rest | Excitatory protocol: delta power reduction, beta power increase  Inhibitory protocol: alpha power increase, beta power reduction | 11 |
| **(Nandi et al., 2023) [11]** | V1 |  | FF (kHz): 270  PD (ms): 3.25  PRF (Hz): 250  DC (%): 50  SD (s): 0.2  Isppa_water (*W/*:16 | Online ERP | Increase of ERP amplitudes (VEP evoked) | 14 |
| **(H.-C. Kim et al., 2023) [12]** | S1 / VPL |  | FF (kHz): 250  PD (ms): 0.5,1,2  PRF (Hz): 1400,700,350  DC (%): 70  SD (s): 0.2  Isppa_water (*W/*:  14.7-S1; 9.1-VPL | Online ERP | Increase of ERP amplitudes (SEP evoked)  No tFUS modulatory effects on ERP auditory evoked potentials | 8 |
| **(Fine et al., 2023) [13]** | IFG |  | FF (kHz): 500  PD (ms): 0.25  PRF (Hz): 1000  DC (%): 24  SD (s): 0.5  Isppa_water (*W/*:22.4 | Online ERP | Reduction of N200/P300 onset latency | 63 (25 of each stimulated) |
| **(Kosnoff et al., 2024) [14]** | V5 |  | FF (kHz): 700  PD (ms): 0.2  PRF (Hz): 3000  DC (%): 60  SD (s): 0.5  PTRI (s): 0.6  PTRD (s): 2.4  Isppa_water (*W/*:1.2 | Online ERP, PSD and Connectivity | Increase of ERP amplitudes (VEP evoked). Theta and alpha power increase. Dorsal connectivity preserved; ventral connectivity weakened | 25 |
| **(Tang et al., 2025) [15]** | S1 |  | FF (kHz): 500  PD (ms): 0.36  PRF (Hz): 1000  DC (%): 36  SD (s): 0.5  Isppa_water (*W/*:1.5 | Online ERP | Reduction of ERP amplitudes (SEP evoked) | 8 |
| **(Dunsford et al., 2026) [16]** | V1 |  | FF (kHz): 500  PD (ms): 500  DC (%): 100  SD (s): 0.5  Isppa_water (*W/*: 40 | Online ERP | Reduction of ERP amplitudes (VEP evoked) | 20 |
| **(Kosnoff et al., 2026) [17]** | V1 |  | FF (kHz): 500  PD (ms): 10, 0.1  PRF (Hz): 30, 3000  DC (%): 30  SD (s): 0.5  PTRI (s): 2  PTRD (s): 2000  Isppa_water (*W/*cm2):  ̴ 6 | Online ERP | tFUS evoked auditory potentials at rest.  Concurrent tDCS with tFUS facilitated subthreshold local evoked responses. | 27 |
| **Supplementary Table 2.** **Summary of all reported human studies employing tFUS-EEG methodologies.** Studies are organized chronologically by year of publication, from earliest (top) to most recent (bottom). mPFC: Medial prefrontal cortex; S1: somatosensory cortex; V1: V1 area of visual cortex; V5: V5 area of visual cortex; IFG: inferior frontal gyrus; VPL: thalamic ventral posterolateral nucleus; FF: fundamental frequency; PD: pulse duration; PRF: pulse repetition frequency; DC: duty cycle; SD: sonication duration (pulse train); PTRI; pulse train repetition interval; PRTD: pulse repetition train duration (i.e., overall pulse protocol duration); Isppa_water: free water intensity at the spatial peak pulse average; Online: during stimulation; Offline: after stimulation; ERP: event related potential; ERSP: event related spectral perturbation; PSD: power spectrum density; SEP: sensory evoked potential; VEP: visual evoked potential. | | | | | | | |

***Supplementary Table 2 references***

[1] Legon W, Sato TF, Opitz A, Mueller J, Barbour A, Williams A, et al. Transcranial focused ultrasound modulates the activity of primary somatosensory cortex in humans. Nat Neurosci 2014;17:322–9. https://doi.org/10.1038/nn.3620.

[2] Mueller J, Legon W, Opitz A, Sato TF, Tyler WJ. Transcranial Focused Ultrasound Modulates Intrinsic and Evoked EEG Dynamics. Brain Stimul 2014;7:900–8. https://doi.org/https://doi.org/10.1016/j.brs.2014.08.008.

[3] Lee W, Kim H, Jung Y, Song I-U, Chung YA, Yoo S-S. Image-Guided Transcranial Focused Ultrasound Stimulates Human Primary Somatosensory Cortex. Sci Rep 2015;5:8743. https://doi.org/10.1038/srep08743.

[4] Lee W, Kim H-C, Jung Y, Chung YA, Song I-U, Lee J-H, et al. Transcranial focused ultrasound stimulation of human primary visual cortex. Sci Rep 2016;6:34026. https://doi.org/10.1038/srep34026.

[5] Legon W, Ai L, Bansal P, Mueller JK. Neuromodulation with single-element transcranial focused ultrasound in human thalamus. Hum Brain Mapp 2018;39:1995–2006. https://doi.org/https://doi.org/10.1002/hbm.23981.

[6] Butler CR, Rhodes E, Blackmore J, Cheng X, Peach RL, Veldsman M, et al. Transcranial ultrasound stimulation to human middle temporal complex improves visual motion detection and modulates electrophysiological responses. Brain Stimul 2022;15:1236–45. https://doi.org/https://doi.org/10.1016/j.brs.2022.08.022.

[7] Braun V, Blackmore J, Cleveland RO, Butler CR. Transcranial ultrasound stimulation in humans is associated with an auditory confound that can be effectively masked. Brain Stimul 2020;13:1527–34. https://doi.org/https://doi.org/10.1016/j.brs.2020.08.014.

[8] Yu K, Liu C, Niu X, He B. Transcranial Focused Ultrasound Neuromodulation of Voluntary Movement-Related Cortical Activity in Humans. IEEE Trans Biomed Eng 2021;68:1923–31. https://doi.org/10.1109/TBME.2020.3030892.

[9] Liu C, Yu K, Niu X, He B. Transcranial Focused Ultrasound Enhances Sensory Discrimination Capability through Somatosensory Cortical Excitation. Ultrasound Med Biol 2021;47:1356–66. https://doi.org/https://doi.org/10.1016/j.ultrasmedbio.2021.01.025.

[10] Kim YG, Kim SE, Lee J, Hwang S, Yoo S-S, Lee HW. Neuromodulation Using Transcranial Focused Ultrasound on the Bilateral Medial Prefrontal Cortex. J Clin Med 2022;11. https://doi.org/10.3390/jcm11133809.

[11] Nandi T, Johnstone A, Martin E, Zich C, Cooper R, Bestmann S, et al. Ramped V1 transcranial ultrasonic stimulation modulates but does not evoke visual evoked potentials. Brain Stimul 2023;16:553–5. https://doi.org/https://doi.org/10.1016/j.brs.2023.02.004.

[12] Kim H-C, Lee W, Weisholtz DS, Yoo S-S. Transcranial focused ultrasound stimulation of cortical and thalamic somatosensory areas in human. PLoS One 2023;18:e0288654-.

[13] Fine JM, Mysore AS, Fini ME, Tyler WJ, Santello M. Transcranial focused ultrasound to human rIFG improves response inhibition through modulation of the P300 onset latency. Elife 2023;12:e86190. https://doi.org/10.7554/eLife.86190.

[14] Kosnoff J, Yu K, Liu C, He B. Transcranial focused ultrasound to V5 enhances human visual motion brain-computer interface by modulating feature-based attention. Nat Commun 2024;15:4382. https://doi.org/10.1038/s41467-024-48576-8.

[15] Tang KWK, Jeong J, Hsieh J-C, Yao M, Ding H, Wang W, et al. Bioadhesive hydrogel-coupled and miniaturized ultrasound transducer system for long-term, wearable neuromodulation. Nat Commun 2025;16:4940. https://doi.org/10.1038/s41467-025-60181-x.

[16] Dunsford S, Murphy K, Darrieutort E, Fouragnan E, Ganis G. Unilateral online ultrasound stimulation of early visual cortex suppresses responses to contralateral visual stimuli. Brain Stimul 2026;19:103023. https://doi.org/https://doi.org/10.1016/j.brs.2025.103023.

[17] Kosnoff J, Gonsisko C, Yu K, Zhang J, Ding Y, Zhang Y, et al. Transcranial focused ultrasound induces source localizable cortical activation in resting state humans when applied concurrently with transcranial electric stimulation. Nat Commun 2026;17:2023. https://doi.org/10.1038/s41467-026-69853-8.
